# Supplementary material for: Maternal Bean Consumption during Pregnancy: Distribution and Nutritional Outcomes
Source: MDPI journal article supplement (doi:10.3390/nu15092234), 2023-05-08
Supplement: s1 [file s1]

**Supplemental Table S1. Maternal Body Mass Index by the Frequency of Bean Consumption During Pregnancy.**

|                                                      | Frequency of dried bean consumption |                    |                       |                            | P-value |
|------------------------------------------------------|-------------------------------------|--------------------|-----------------------|----------------------------|---------|
|                                                      | Never (a)                           | 1 time a month (b) | 2-3 times a month (c) | 1 or more times a week (d) |         |
|                                                      | Mean ± SD /n (%)                    | Mean ± SD /n (%)   | Mean ± SD /n (%)      | Mean ± SD /n (%)           |         |
| <b>Body mass index, kg/m<sup>2</sup>, mean ± SD*</b> | 26.7 ± 7.3                          | 26.1 ± 6.4         | 26.1 ± 6.5            | 26.8 ± 6.5                 | 0.430   |
| <b>Body mass index categories, n (%)**</b>           |                                     |                    |                       |                            | 0.685   |
| Underweight/normal weight                            | 321 (51.4)                          | 109 (51.2)         | 167 (52.5)            | 116 (51.1)                 |         |
| Overweight                                           | 136 (21.8)                          | 51 (23.9)          | 82 (25.8)             | 55 (24.2)                  |         |
| Obese                                                | 168 (26.9)                          | 53 (24.9)          | 69 (21.7)             | 56 (24.7)                  |         |

SD: standard deviation.

\* Analysis of variance.

\*\* Chi-square test.

|                                                      | Frequency of chili consumption |                    |                       |                            | P-value |
|------------------------------------------------------|--------------------------------|--------------------|-----------------------|----------------------------|---------|
|                                                      | Never (a)                      | 1 time a month (b) | 2-3 times a month (c) | 1 or more times a week (d) |         |
|                                                      | Mean ± SD /n (%)               | Mean ± SD /n (%)   | Mean ± SD /n (%)      | Mean ± SD /n (%)           |         |
| <b>Body mass index, kg/m<sup>2</sup>, mean ± SD*</b> | 26.5 ± 6.7                     | 26.3 ± 7.1         | 26.4 ± 7.2            | 27.7 ± 8.7                 | 0.773   |
| <b>Body mass index categories, n (%)**</b>           |                                |                    |                       |                            | 0.762   |
| Underweight/normal weight                            | 459 (51.2)                     | 166 (54.1)         | 76 (50.3)             | 10 (37.0)                  |         |
| Overweight                                           | 209 (23.3)                     | 70 (22.8)          | 37 (24.5)             | 8 (29.6)                   |         |
| Obese                                                | 228 (25.4)                     | 71 (23.1)          | 38 (25.2)             | 9 (33.3)                   |         |

SD: standard deviation.

\* Analysis of variance.

\*\* Chi-square test.

|                                                      | Frequency of bean soup consumption |                    |                             | P-value |
|------------------------------------------------------|------------------------------------|--------------------|-----------------------------|---------|
|                                                      | Never (a)                          | 1 time a month (b) | 2 or more times a month (c) |         |
|                                                      | Mean ± SD /n (%)                   | Mean ± SD /n (%)   | Mean ± SD /n (%)            |         |
| <b>Body mass index, kg/m<sup>2</sup>, mean ± SD*</b> | 26.7 ± 6.9                         | 25.4 ± 6.6         | 24.8 ± 5.8                  | 0.015   |
| <b>Body mass index categories, n (%)**</b>           |                                    |                    |                             | 0.017   |
| Underweight/normal weight                            | 560 (49.6)                         | 125 (59.8)         | 27 (65.9)                   |         |
| Overweight                                           | 270 (23.9)                         | 45 (21.5)          | 8 (19.5)                    |         |
| Obese                                                | 299 (26.5)                         | 39 (18.7)          | 6 (14.6)                    |         |

SD: standard deviation.

\* Analysis of variance.

\*\* Chi-square test.
